# Supplementary material
Source: publisher figshare collection journal article supplement (https://acs.figshare.com/ndownloader/files/4592968)

**Supplementary Figure 1**  
**Jung et al.**

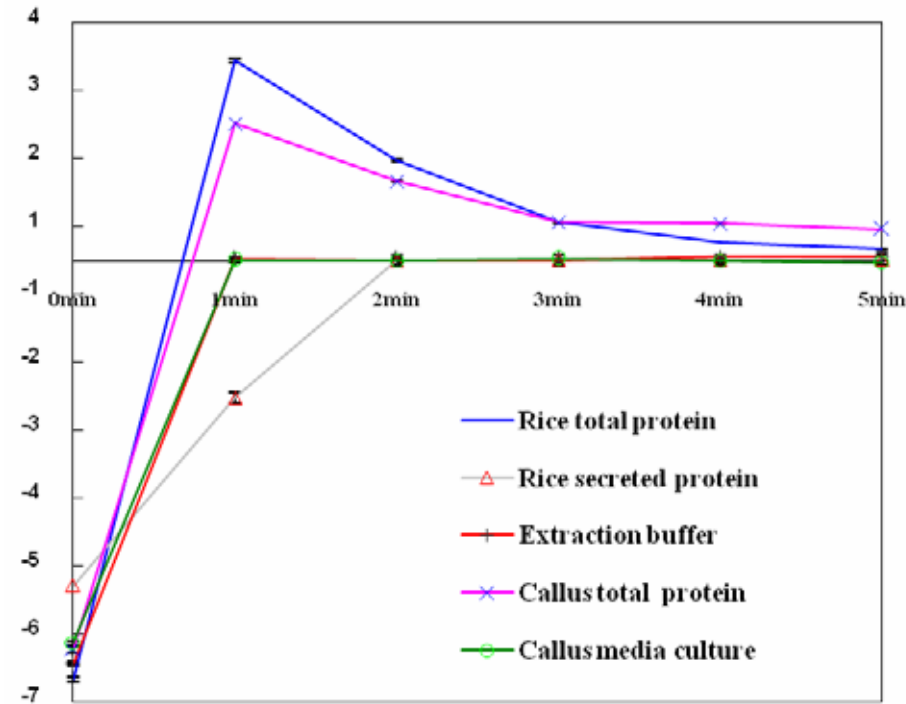

**Table 1. Malate dehydrogenase activities were determined during the first 1minute after reaction. (nmol mg protein<sup>-1</sup> min<sup>-1</sup>)**

| Material Fraction       | MDH activity |
|-------------------------|--------------|
| Rice soluble protein    | 2.94±0.03    |
| Rice secreted protein   | 0.00±0.07    |
| Callus soluble protein  | 2.02±0.01    |
| Callus secreted protein | 0.01±0.03    |
| Extraction buffer       | 0.01±0.02    |

# Supplementary Figure 2 Jung et al.

Spot number ; 20

| Filename             | z | Score | SPI (%) | Spectrum Intensity | Sequence Map                                        |
|----------------------|---|-------|---------|--------------------|-----------------------------------------------------|
| SEC00029.1809.1809.0 | 3 | 17.79 | 87.1    | 6.39e+006          | (K)A T/G A F/I L/T A S H N/P G/G P T E/D F/G I\K(Y) |

| m/z Measured (Da) | MH <sup>+</sup> Matched (Da) | MH <sup>+</sup> Error (Da) | MH <sup>+</sup> Error (ppm) | Peptide pI | Protein MW (Da) | Accession # | Protein Name |
|-------------------|------------------------------|----------------------------|-----------------------------|------------|-----------------|-------------|--------------|
| 767.78            | 2301.151                     | 0.1745                     | 75.8                        | 5.32       | 62949.5         | 115454931   | Os03g0712700 |

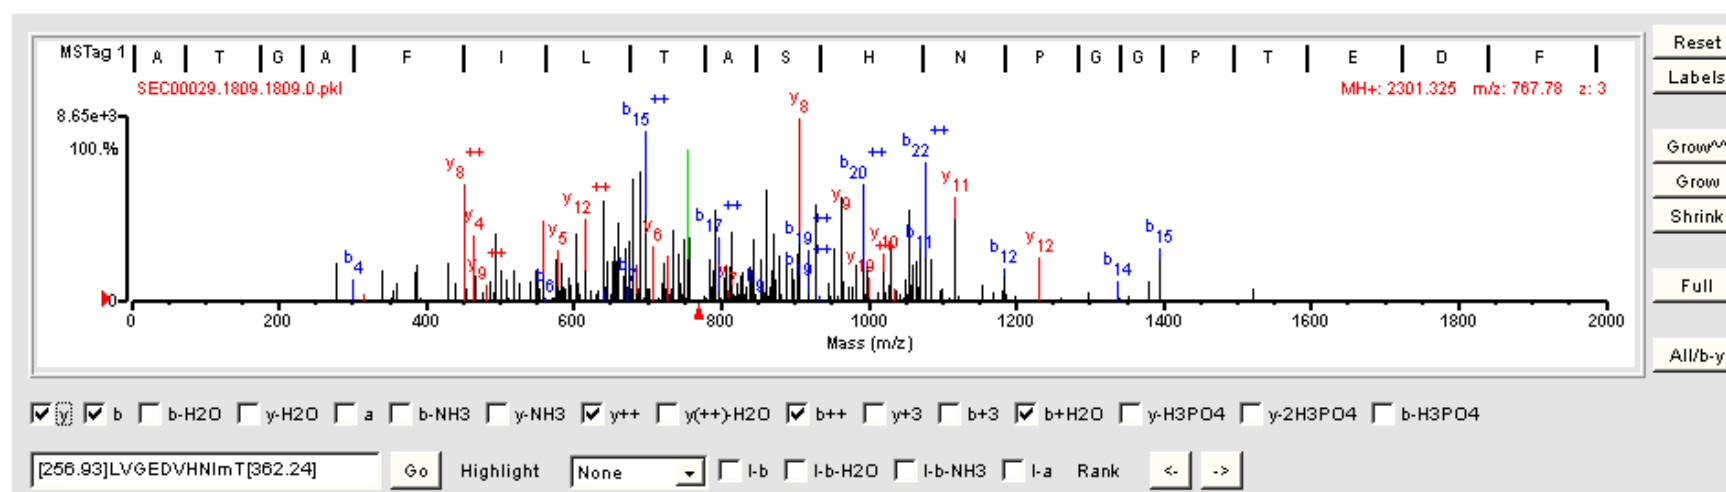

## Spot number ; 114

| Filename             | z | Score | SPI (%) | Spectrum Intensity | Sequence Map              |
|----------------------|---|-------|---------|--------------------|---------------------------|
| SEC00004.1347.1366.2 | 2 | 17.39 | 96.9    | 3.27e+007          | (K)V/T F L D D A Q V\K(K) |

| m/z Measured (Da) | MH <sup>+</sup> Matched (Da) | MH <sup>+</sup> Error (Da) | MH <sup>+</sup> Error (ppm) | Peptide pI | Protein MW (Da) | Accession # | Protein Name |
|-------------------|------------------------------|----------------------------|-----------------------------|------------|-----------------|-------------|--------------|
| 568.28            | 1135.599                     | -0.0466                    | -41.0                       | 4.21       | 21861.3         | 115476760   | Os08g0460000 |

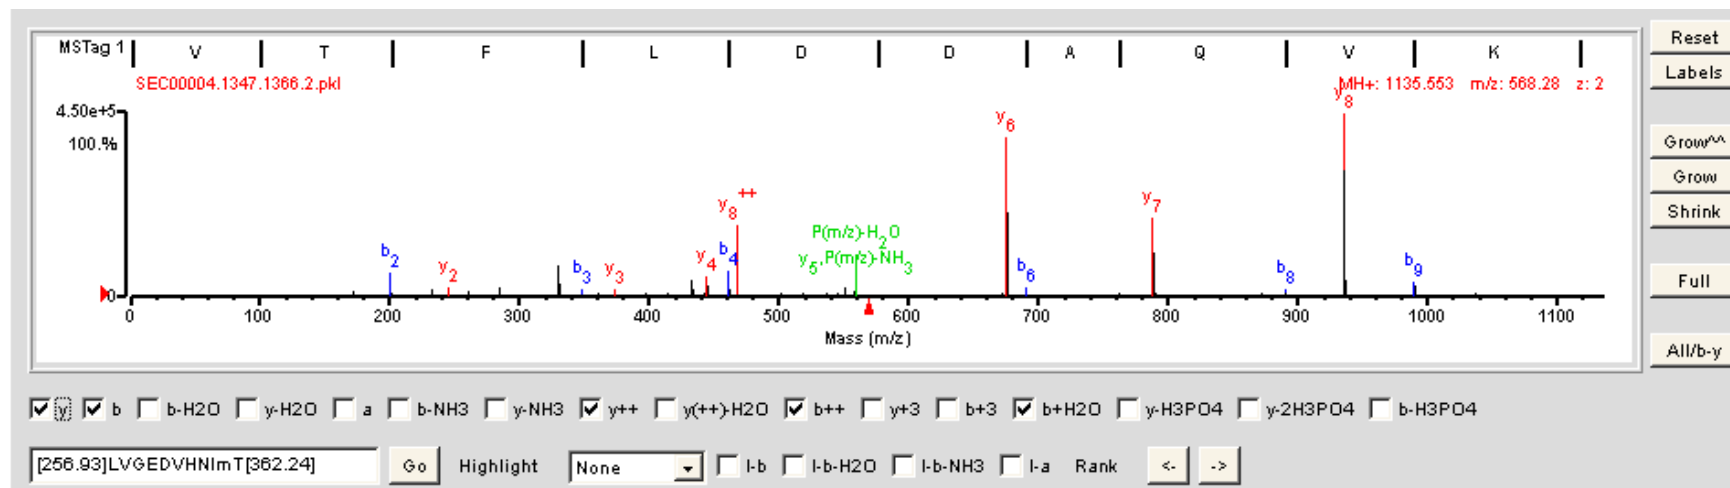

## Spot number ; 123

| Filename             | z | Score | SPI (%) | Spectrum Intensity | Sequence Map            |
|----------------------|---|-------|---------|--------------------|-------------------------|
| SEC00009.1172.1186.2 | 2 | 16.06 | 96.7    | 6.28e+006          | (R)V/F Q V E Y A T K(A) |

| m/z Measured (Da) | MH <sup>+</sup> Matched (Da) | MH <sup>+</sup> Error (Da) | MH <sup>+</sup> Error (ppm) | Peptide pI | Protein MW (Da) | Accession # | Protein Name |
|-------------------|------------------------------|----------------------------|-----------------------------|------------|-----------------|-------------|--------------|
| 542.77            | 1084.567                     | -0.0346                    | -31.9                       | 5.97       | 27238.2         | 115440617   | Os01g0811100 |

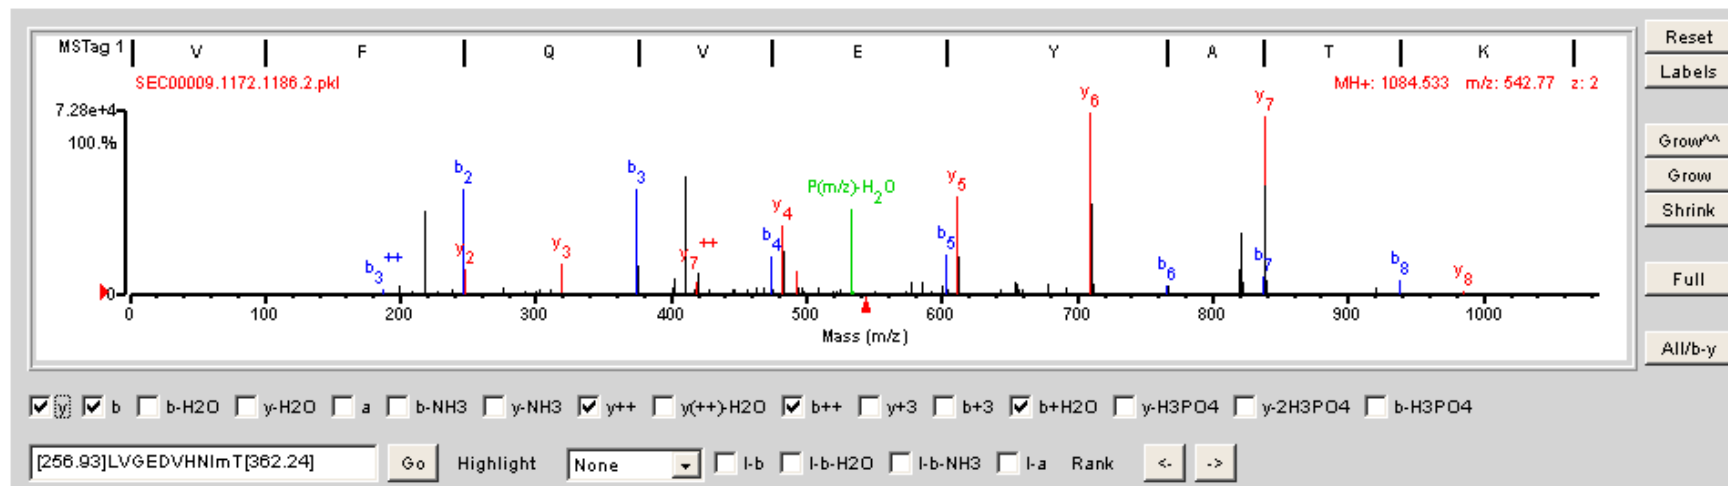

## Spot number ; 124

| Filename             | z | Score | SPI (%) | Spectrum Intensity | Sequence Map          |
|----------------------|---|-------|---------|--------------------|-----------------------|
| SEC00010.1004.1019.2 | 2 | 14.13 | 95.3    | 1.68e+007          | (R)R I/E\E\Y E L R(R) |

| m/z Measured (Da) | MH <sup>+</sup> Matched (Da) | MH <sup>+</sup> Error (Da) | MH <sup>+</sup> Error (ppm) | Peptide pI | Protein MW (Da) | Accession # | Protein Name                        |
|-------------------|------------------------------|----------------------------|-----------------------------|------------|-----------------|-------------|-------------------------------------|
| 554.37            | 1107.579                     | 0.1534                     | 138.5                       | 4.79       | 30579.6         | 77553334    | hypothetical protein LOC_Os12g10480 |

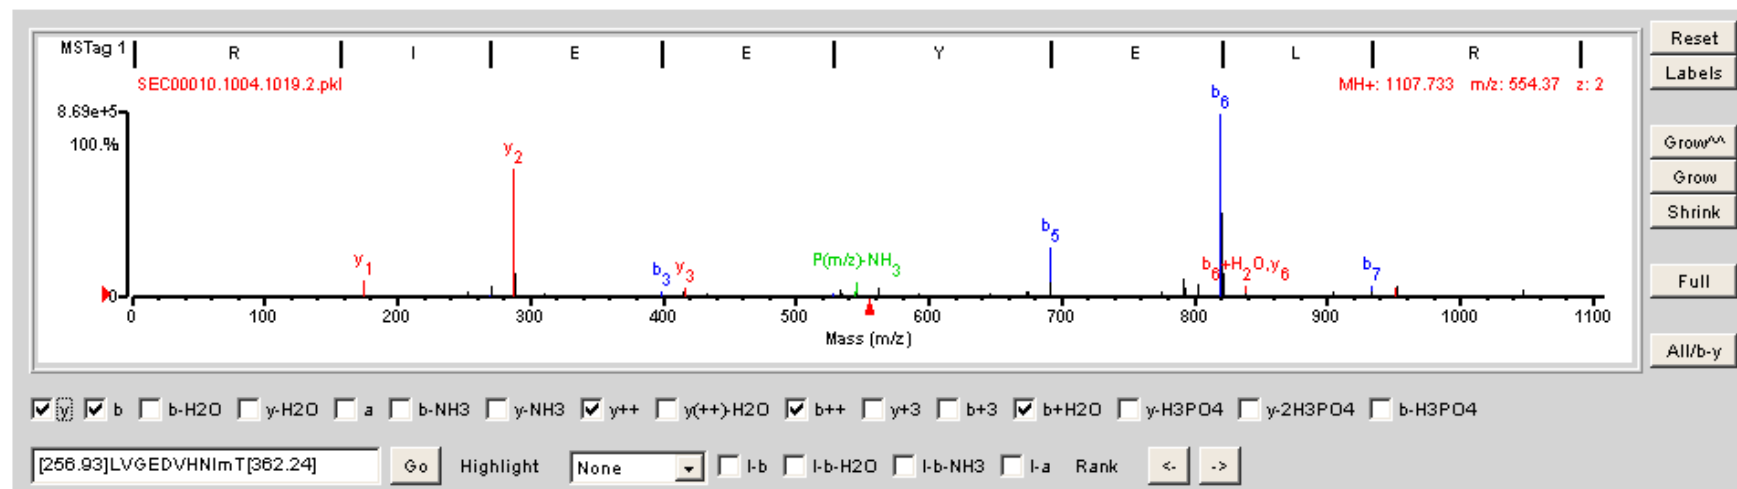

## Spot number ; 146

| Filename             | z | Score | SPI (%) | Spectrum Intensity | Sequence Map            |
|----------------------|---|-------|---------|--------------------|-------------------------|
| SEC00002.1923.1925.2 | 2 | 16.67 | 98.0    | 1.11e+007          | (R)T A L A F V T L R(G) |

| m/z Measured (Da) | MH <sup>+</sup> Matched (Da) | MH <sup>+</sup> Error (Da) | MH <sup>+</sup> Error (ppm) | Peptide pl | Protein MW (Da) | Accession # | Protein Name                                 |
|-------------------|------------------------------|----------------------------|-----------------------------|------------|-----------------|-------------|----------------------------------------------|
| 496.32            | 991.593                      | 0.0392                     | 39.5                        | 9.41       | 37028.6         | 15242193    | pfkB-type carbohydrate kinase family protein |

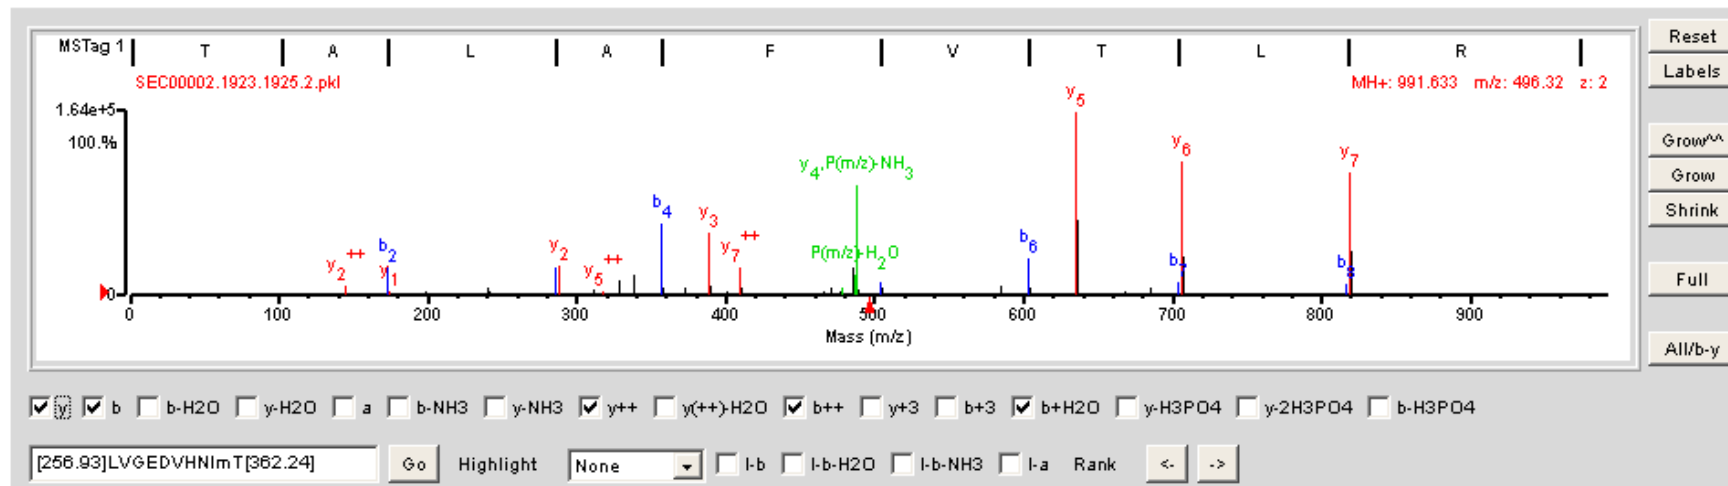

## Spot number ; 166

| Filename             | z | Score | SPI (%) | Spectrum Intensity | Sequence Map                |
|----------------------|---|-------|---------|--------------------|-----------------------------|
| SEC00001.2038.2047.2 | 2 | 15.71 | 92.8    | 6.37e+006          | (K)V/V L V D N/A/D F L\K(E) |

| m/z Measured (Da) | MH <sup>+</sup> Matched (Da) | MH <sup>+</sup> Error (Da) | MH <sup>+</sup> Error (ppm) | Peptide pI | Protein MW (Da) | Accession # | Protein Name |
|-------------------|------------------------------|----------------------------|-----------------------------|------------|-----------------|-------------|--------------|
| 616.78            | 1232.689                     | -0.1358                    | -110.2                      | 4.21       | 32539.6         | 16580747    | glyoxalase I |

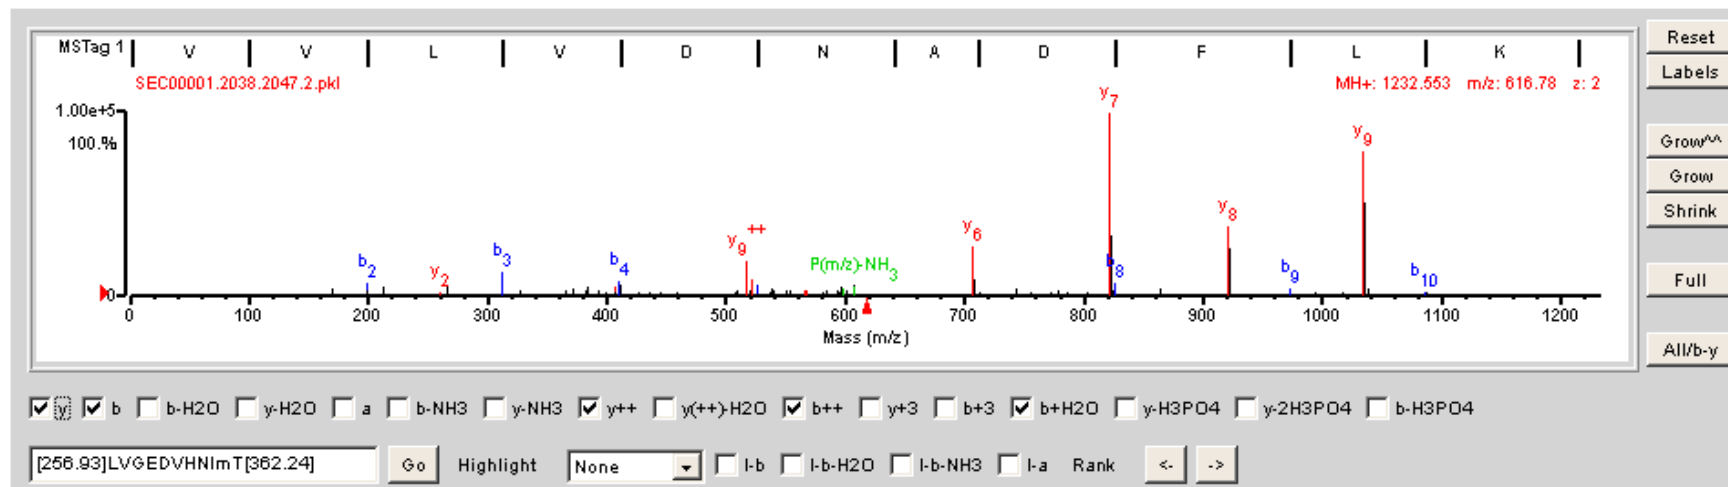

## Spot number ; 172

| Filename              | z | Score | SPI (%) | Spectrum Intensity | Sequence Map                              |
|-----------------------|---|-------|---------|--------------------|-------------------------------------------|
| SEC000006.1409.1422.0 | 3 | 19.88 | 97.4    | 1.49e+007          | (R)D T/G/E/G/F/G/A/A/P D/I/D/H L N P R(V) |

| m/z Measured (Da) | MH <sup>+</sup> Matched (Da) | MH <sup>+</sup> Error (Da) | MH <sup>+</sup> Error (ppm) | Peptide pl | Protein MW (Da) | Accession # | Protein Name  |
|-------------------|------------------------------|----------------------------|-----------------------------|------------|-----------------|-------------|---------------|
| 628.17            | 1881.873                     | 0.6229                     | 331.0                       | 4.22       | 47925.5         | 11263717    | alpha-amylase |

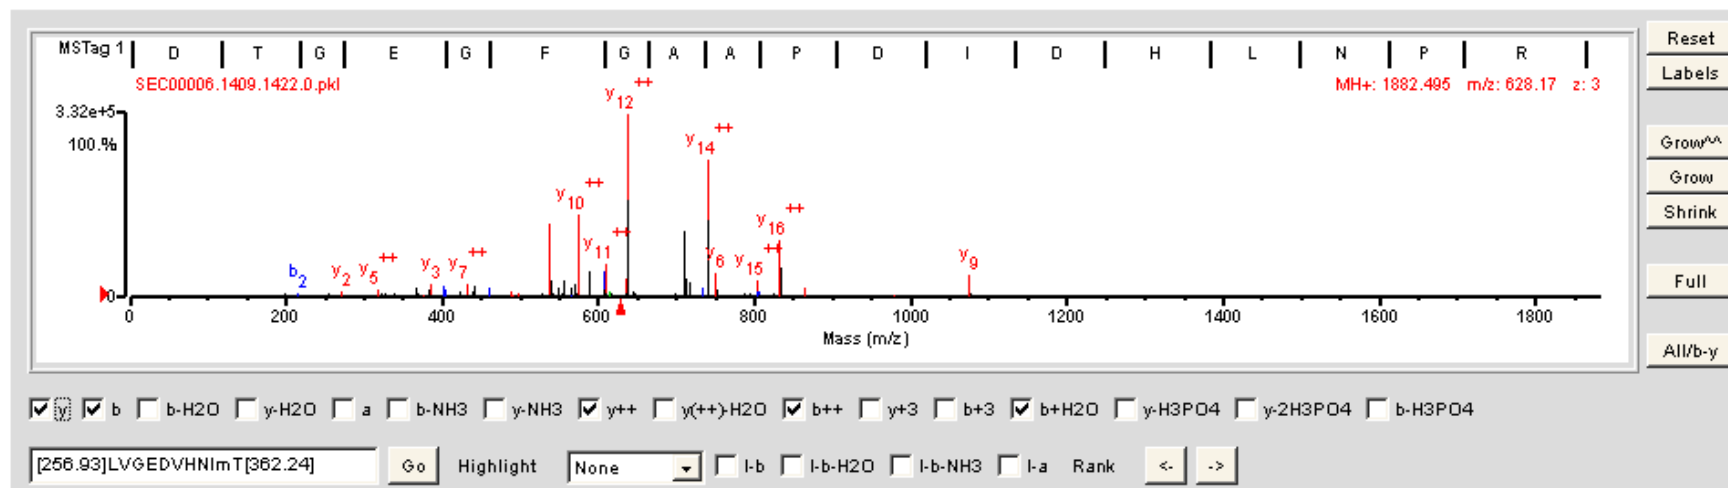



## Spot number ; 184

| Filename             | z | Score | SPI (%) | Spectrum Intensity | Sequence Map                    |
|----------------------|---|-------|---------|--------------------|---------------------------------|
| SEC00030.1449.1460.2 | 2 | 14.52 | 88.9    | 2.71e+007          | (R)C P/D A Y L F P E/D/N T K(T) |

| m/z Measured (Da) | MH <sup>+</sup> Matched (Da) | MH <sup>+</sup> Error (Da) | MH <sup>+</sup> Error (ppm) | Peptide pI | Protein MW (Da) | Accession # | Protein Name |
|-------------------|------------------------------|----------------------------|-----------------------------|------------|-----------------|-------------|--------------|
| 785.29            | 1569.689                     | -0.1163                    | -74.1                       | 4.03       | 17992.2         | 115489688   | Os12g0628600 |

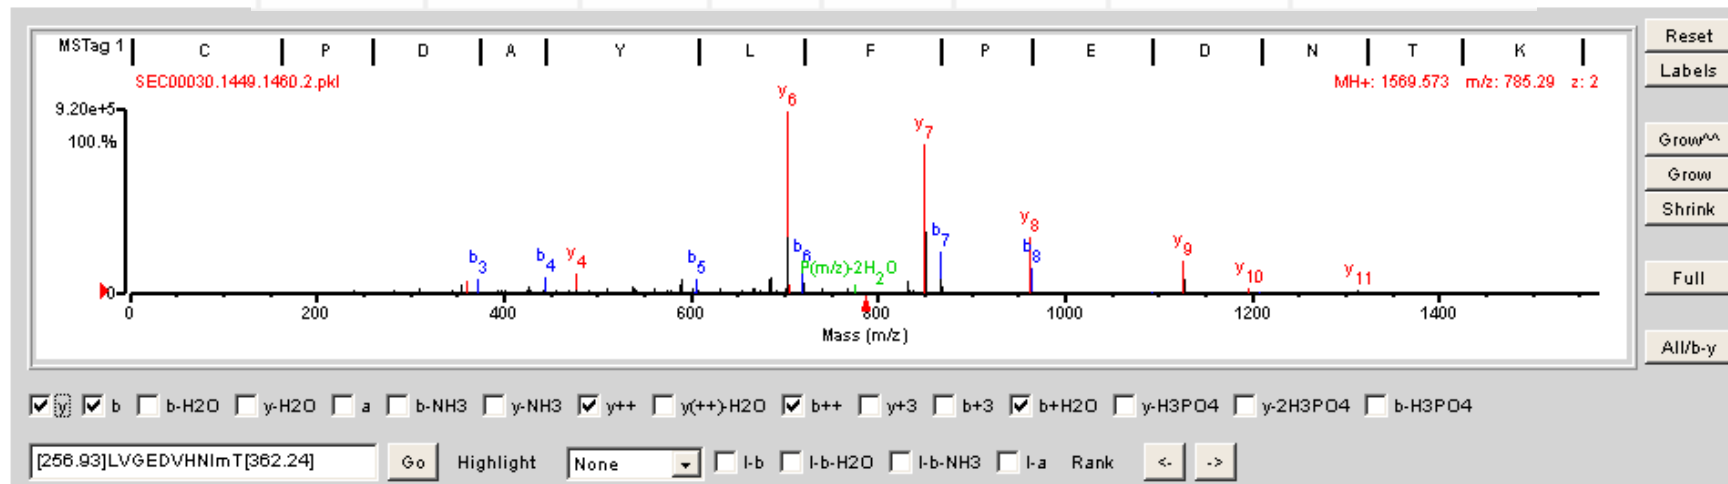

## Spot number ; 188

| Filename             | z | Score | SPI (%) | Spectrum Intensity | Sequence Map                  |
|----------------------|---|-------|---------|--------------------|-------------------------------|
| SEC00010.1612.1614.0 | 2 | 17.76 | 94.1    | 8.32e+006          | (K)I I N V D N V Q E A A R(E) |

| m/z Measured (Da) | MH <sup>+</sup> Matched (Da) | MH <sup>+</sup> Error (Da) | MH <sup>+</sup> Error (ppm) | Peptide pl | Protein MW (Da) | Accession # | Protein Name |
|-------------------|------------------------------|----------------------------|-----------------------------|------------|-----------------|-------------|--------------|
| 671.32            | 1341.712                     | -0.0794                    | -59.2                       | 4.37       | 52950.7         | 115476014   | Os08g0345800 |

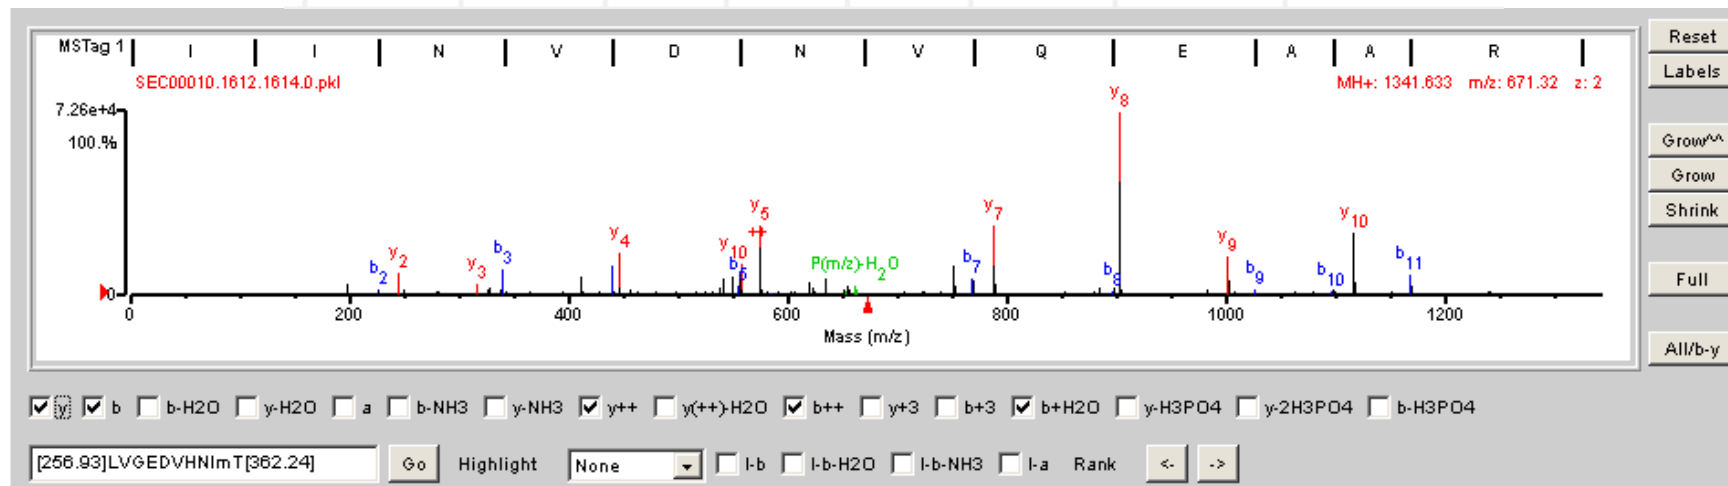

## Spot number ; C4

| Filename             | z | Score | SPI (%) | Spectrum Intensity | Sequence Map                                                    |
|----------------------|---|-------|---------|--------------------|-----------------------------------------------------------------|
| SEC00006.2685.2685.0 | 3 | 17.09 | 94.2    | 2.29e+006          | (K)G F Y/T Y/D A/F/V A A A N/A Y/P D/F A T/T G D/A D/T C K R(E) |

| m/z Measured (Da) | MH <sup>+</sup> Matched (Da) | MH <sup>+</sup> Error (Da) | MH <sup>+</sup> Error (ppm) | Peptide pI | Protein MW (Da) | Accession # | Protein Name |
|-------------------|------------------------------|----------------------------|-----------------------------|------------|-----------------|-------------|--------------|
| 1061.11           | 3179.405                     | 1.9103                     | 600.8                       | 4.14       | 33681.6         | 115470054   | Os06g0726100 |

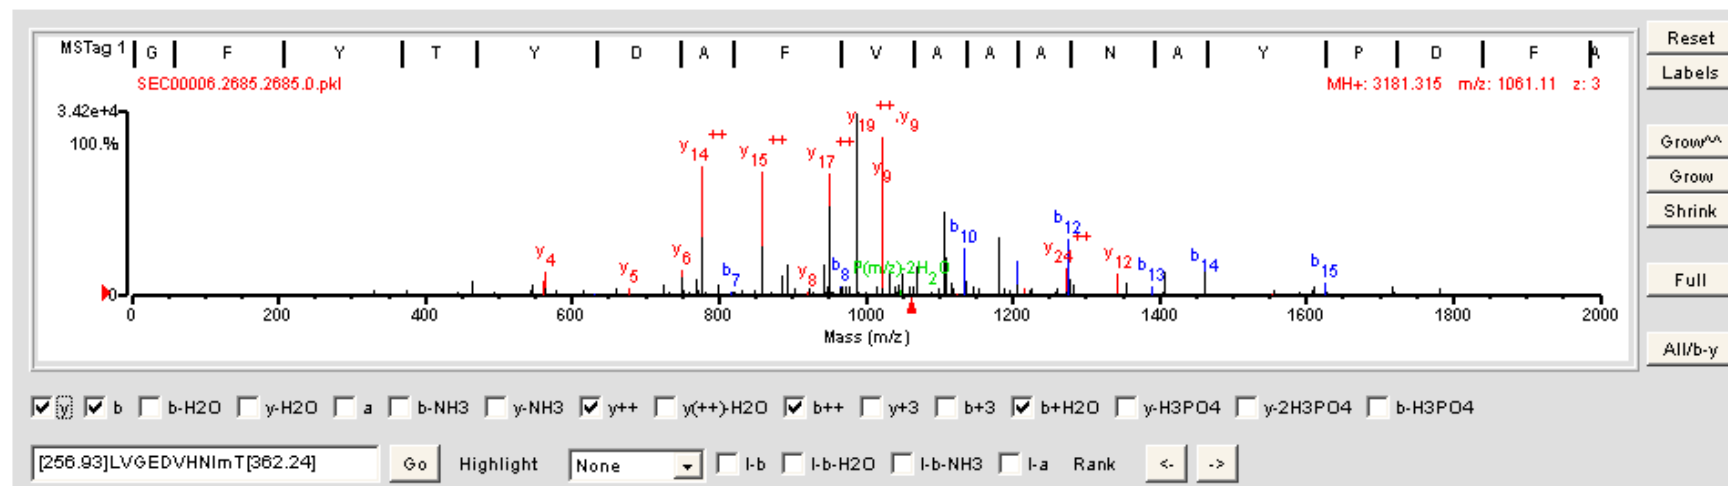

## Spot number ; C24

| Filename             | z | Score | SPI (%) | Spectrum Intensity | Sequence Map            |
|----------------------|---|-------|---------|--------------------|-------------------------|
| SEC00021.2286.2294.2 | 2 | 14.95 | 91.4    | 1.84e+008          | (R)I/G/F N D C/L V\K(G) |

| m/z Measured (Da) | MH <sup>+</sup> Matched (Da) | MH <sup>+</sup> Error (Da) | MH <sup>+</sup> Error (ppm) | Peptide pl | Protein MW (Da) | Accession # | Protein Name    |
|-------------------|------------------------------|----------------------------|-----------------------------|------------|-----------------|-------------|-----------------|
| 533.27            | 1065.540                     | -0.0070                    | -6.6                        | 5.83       | 21738.9         | 20270065    | Unknown protein |

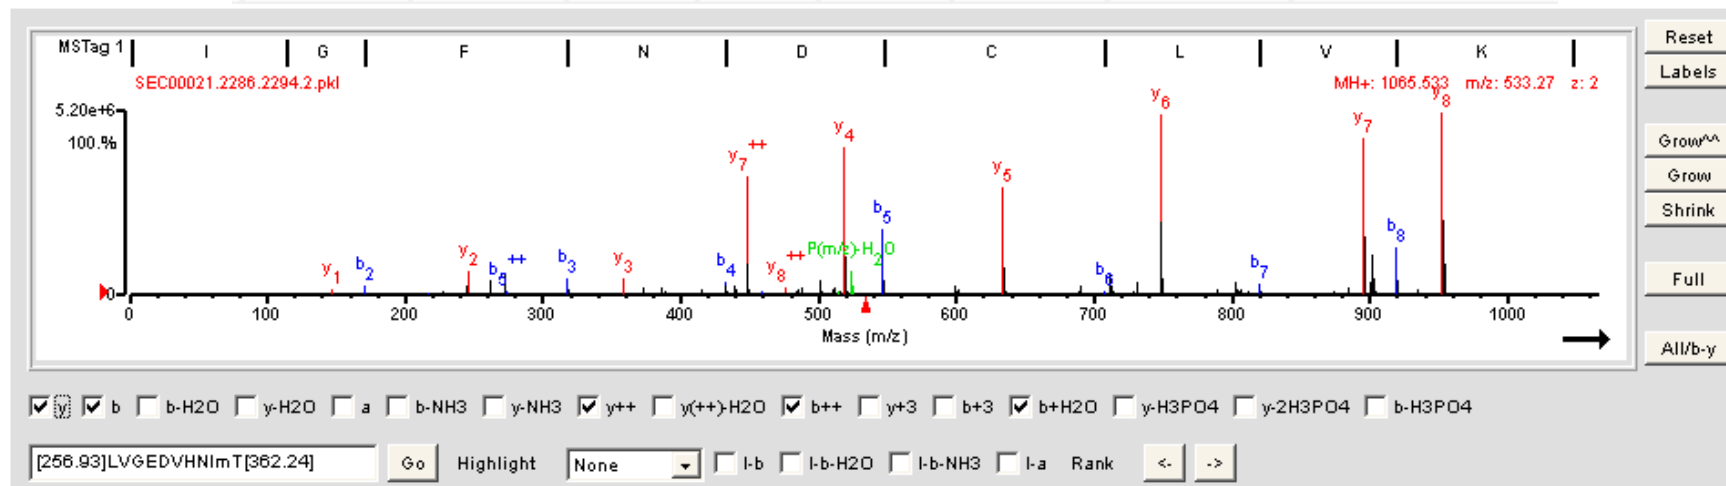

## Spot number ; C25

| Filename             | z | Score | SPI (%) | Spectrum Intensity | Sequence Map                |
|----------------------|---|-------|---------|--------------------|-----------------------------|
| SEC00016.1493.1495.2 | 2 | 14.80 | 84.9    | 1.57e+007          | (K)Y/G V T E S T/L L\T R(N) |

| m/z Measured (Da) | MH <sup>+</sup> Matched (Da) | MH <sup>+</sup> Error (Da) | MH <sup>+</sup> Error (ppm) | Peptide pI | Protein MW (Da) | Accession # | Protein Name |
|-------------------|------------------------------|----------------------------|-----------------------------|------------|-----------------|-------------|--------------|
| 620.38            | 1239.658                     | 0.0948                     | 76.5                        | 6.00       | 37200.6         | 115450549   | Os03g0133400 |

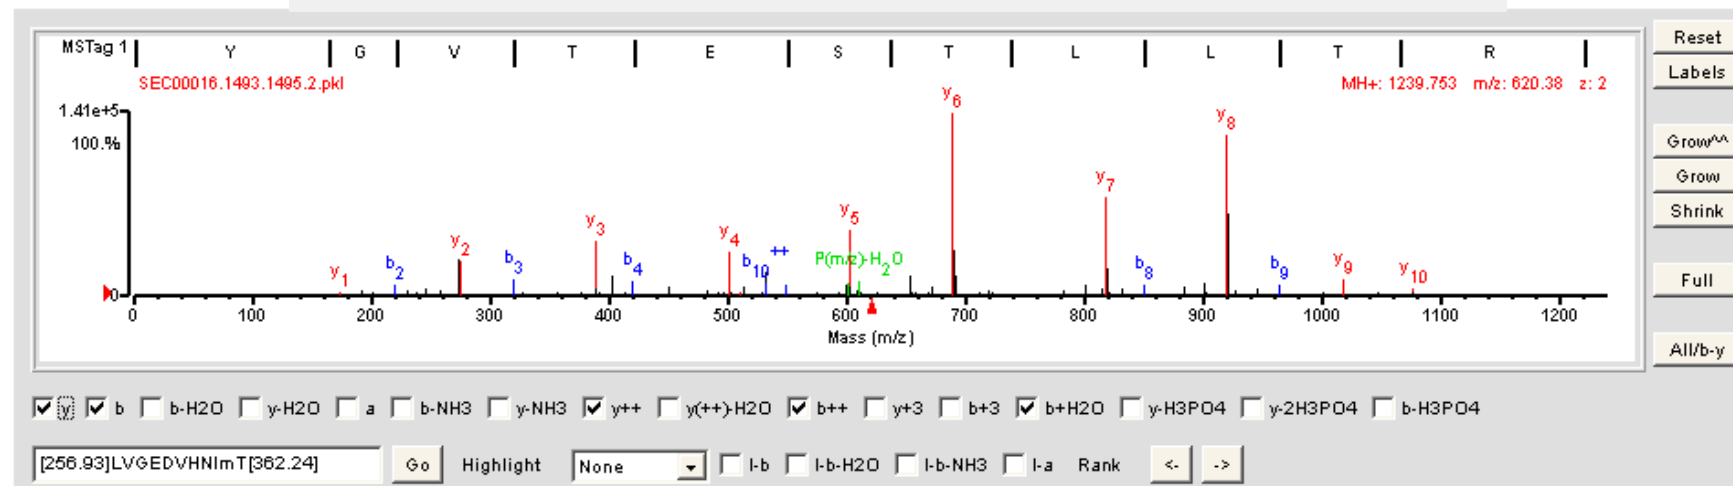

Supplement: Supplementary file 1 [file 4592968]
